# Supplementary material for: Luminescence thermochromism of acrylic materials incorporating copper iodide clusters
Source: Royal Society of Chemistry journal article supplement (doi:10.1039/c1jm13600c), 2011-01-01
Supplement: c1jm13600c.pdf [file c1jm13600c.pdf]

## Electronic Supplementary Information

### Luminescence thermochromism of acrylic materials incorporating copper iodide clusters

*Ignazio Roppolo,<sup>a</sup> Edvige Celasco,<sup>a</sup> Alexandre Fargues,<sup>b</sup> Alain Garcia,<sup>b</sup> Amélie Revaux,<sup>c</sup> Géraldine Dantelle,<sup>c</sup> Fouad Maroun,<sup>c</sup> Thierry Gacoin,<sup>c</sup> Jean-Pierre Boilot,<sup>c</sup> Marco Sangermano<sup>a</sup> and Sandrine Perruchas<sup>c\*</sup>*

<sup>a</sup> Politecnico di Torino - Dipartimento di Scienza dei Materiali e Ingegneria Chimica, C.so Duca degli Abruzzi 24, 10129 Torino, Italy.

<sup>b</sup> Institut de Chimie de la Matière Condensée de Bordeaux (ICMCB) - CNRS, 87 Avenue du Docteur A. Schweitzer, 33608 Pessac Cedex, France.

<sup>c</sup> Laboratoire de Physique de la Matière Condensée (PMC), CNRS - Ecole Polytechnique, 91128 Palaiseau Cedex, France.

Fax: (+33) (0)1 69 33 47 99; Phone: (+33) (0)1 69 33 46 85.

E-mail: sandrine.perruchas@polytechnique.edu

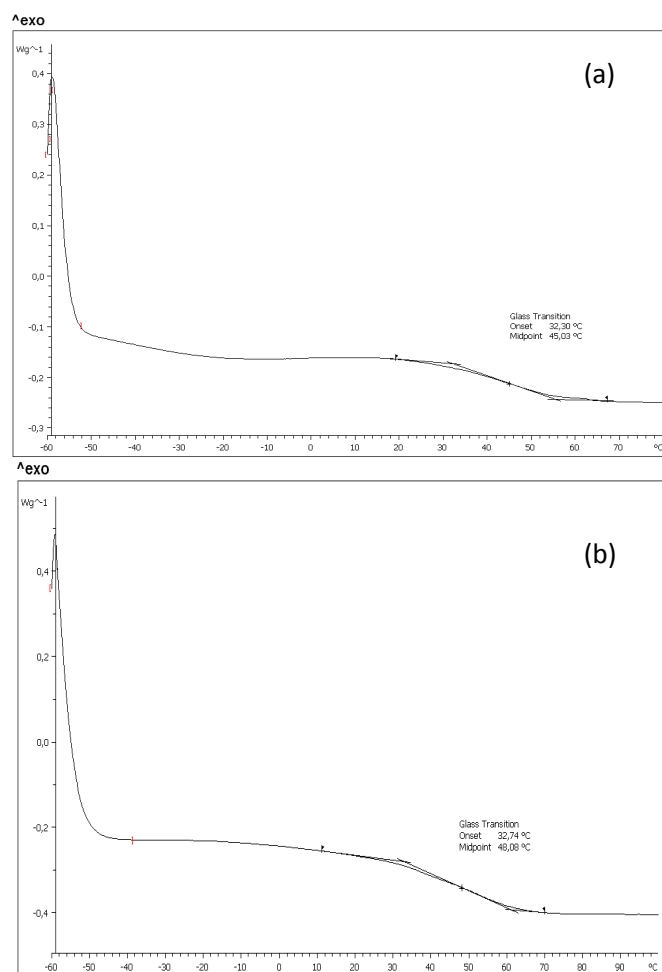

**Figure S1.** DSC curves of BEDA (a) and BEDA + 2wt% cluster (b).

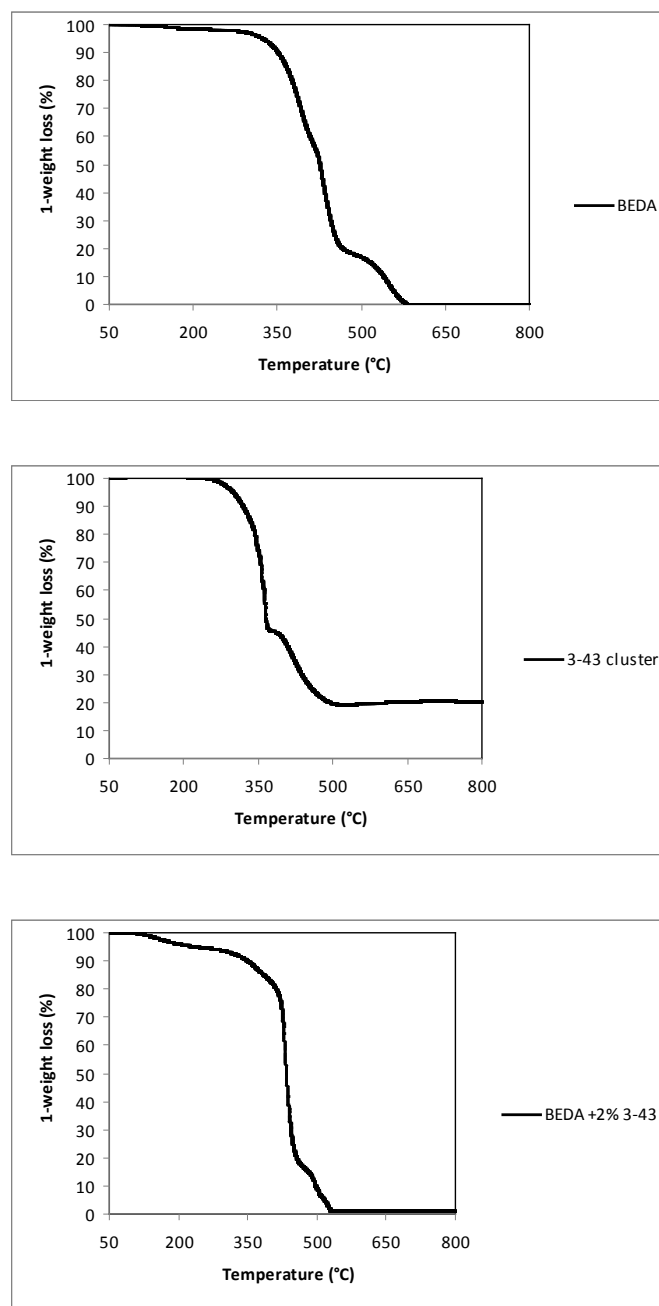

**Figure S2.** TGA curves of BEDA, the pure cluster and BEDA + 2wt% cluster.

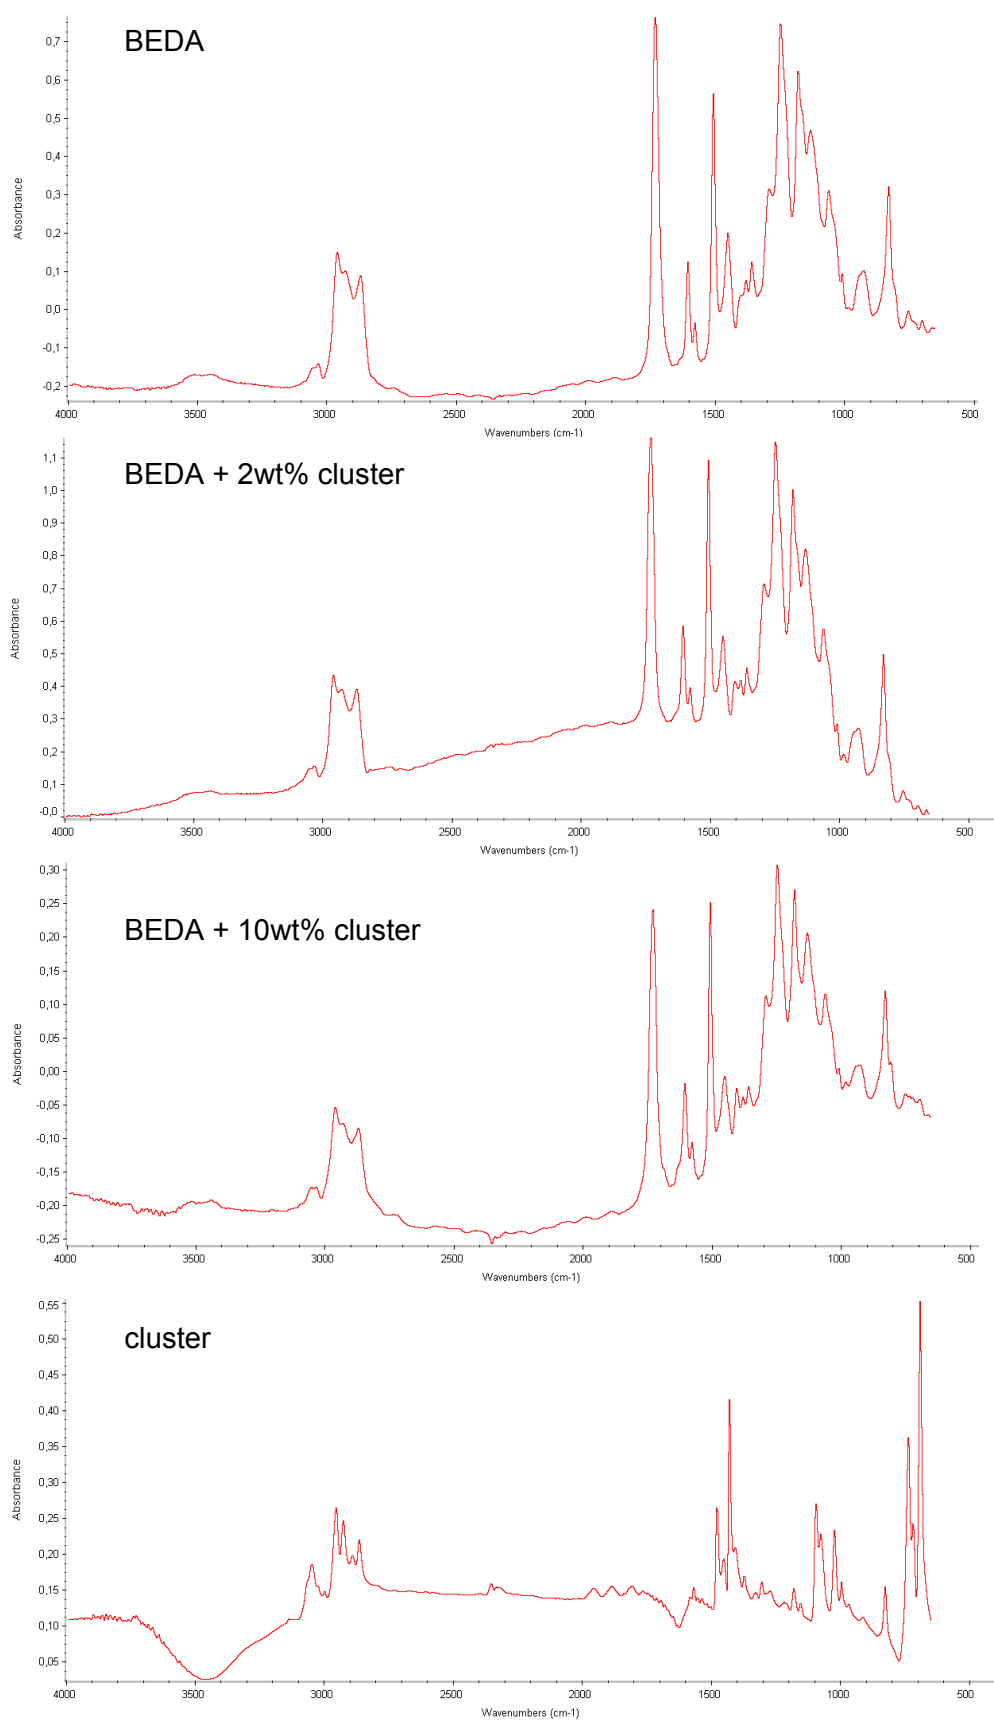

**Figure S3.** FTIR spectra of pure BEDA, BEDA + 2 and 10 wt% cluster and the pure cluster.

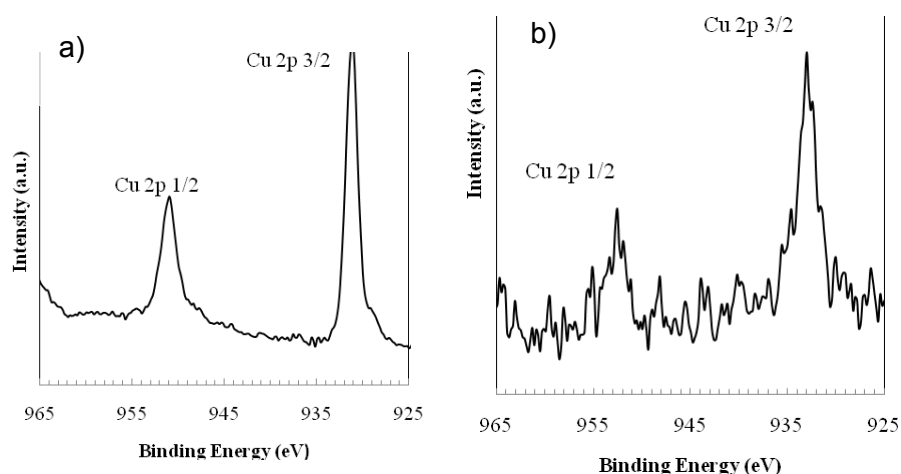

**Figure S4.** XPS spectra of Cu 2p lines of (a)  $[\text{Cu}_4\text{I}_4(\text{PPh}_2(\text{CH}_2)_2\text{CH}_3)_4]$  and (b) BEDA+2wt% cluster.

**Table S1.** XPS data for the  $[\text{Cu}_4\text{I}_4(\text{PPh}_2(\text{CH}_2)_2\text{CH}_3)_4]$  and BEDA+2 wt% cluster.

|                      | $[\text{Cu}_4\text{I}_4(\text{PPh}_2(\text{CH}_2)_2\text{CH}_3)_4]$ |                                   |             |                          |          | BEDA + $[\text{Cu}_4\text{I}_4(\text{PPh}_2(\text{CH}_2)_2\text{CH}_3)_4]$ 2 wt% |                                   |             |                          |          |
|----------------------|---------------------------------------------------------------------|-----------------------------------|-------------|--------------------------|----------|----------------------------------------------------------------------------------|-----------------------------------|-------------|--------------------------|----------|
|                      | BE Values (eV)                                                      | BE Cu 2p <sub>3/2</sub> corrected | correct ion | BE Values corrected (eV) | Atomic % | BE Values (eV)                                                                   | BE Cu 2p <sub>3/2</sub> corrected | correct ion | BE Values corrected (eV) | Atomic % |
| Cu 2p <sub>3/2</sub> | 931.17                                                              | 933                               | 1.83        | 933                      | 4.51     | 932.01                                                                           | 933                               | 0.99        | 933                      | 0.12     |
| I 3d <sub>5/2</sub>  | 617.66                                                              |                                   |             | 619.82                   | 5.53     | 619.00                                                                           |                                   |             | 619.99                   | 0.10     |
| P 2p                 | 128.99                                                              |                                   |             | 130.82                   | 4.15     | -                                                                                |                                   |             | -                        | -        |
| O 1s                 | 530.91                                                              |                                   |             | 532.74                   | 3.80     | 531.15                                                                           |                                   |             | 532.13                   | 4.52     |
| C 1s                 | 282.84                                                              |                                   |             | 284.67                   | 82.02    | 283.09                                                                           |                                   |             | 284.08                   | 95.26    |

**Table S2. Photoluminescence data.**

| compound                                                                                                                                                 | T (K) | $\lambda_{em}^{max}$ (nm) | Band Attribution |
|----------------------------------------------------------------------------------------------------------------------------------------------------------|-------|---------------------------|------------------|
| BEDA composite<br>(2 wt%)                                                                                                                                | 290   | 580                       | LE               |
|                                                                                                                                                          | 200   | 575                       | LE               |
|                                                                                                                                                          | 150   | 575                       | LE               |
|                                                                                                                                                          |       | 430                       | HE               |
|                                                                                                                                                          | 100   | 575                       | LE               |
| 430                                                                                                                                                      |       | HE                        |                  |
| [Cu <sub>4</sub> I <sub>4</sub> (PPh <sub>2</sub> (CH <sub>2</sub> ) <sub>2</sub> CH <sub>3</sub> ) <sub>4</sub> ]<br>in CH <sub>2</sub> Cl <sub>2</sub> | 290   | 610                       | LE               |
|                                                                                                                                                          | 200   | 625                       | LE               |
|                                                                                                                                                          | 150   | 580                       | LE               |
|                                                                                                                                                          |       | 435                       | HE               |
|                                                                                                                                                          | 100   | 575                       | LE               |
| 425                                                                                                                                                      |       | HE                        |                  |
| 8                                                                                                                                                        | 575   | LE                        |                  |
|                                                                                                                                                          | 420   | HE                        |                  |
